# Supplementary material for: New insights into the synthesis of Sillén–Aurivillius oxyhalides: molten salts induce interlayer halogen competing reaction
Source: Royal Society of Chemistry journal article supplement (doi:10.1039/d3ta05438a), 2023-11-21
Supplement: d3ta05438a1.pdf [file d3ta05438a1.pdf]

Supporting Information

## New Insights into the Synthesis of Sillén–Aurivillius Oxyhalides: Molten Salt induces Interlayer Halogen Competing Reaction

Yunxiang Zhang,<sup>a,b</sup> Chenliang Zhou,<sup>a</sup> Shishi Xu,<sup>a</sup> Hazem Abdelsalam,<sup>a,c</sup> Zhichao Mu,<sup>a</sup> Wei Chen,<sup>a</sup> Zhili Chen,<sup>a</sup> Xiangyu Cheng,<sup>a</sup> Diab Khalafallah<sup>a,d</sup> and Qinfang Zhang<sup>a,b,\*</sup>

a. School of Materials Science and Engineering, Yancheng Institute of Technology, Yancheng 224051, China.

Email: qfangzhang@gmail.com.

b. Key Laboratory for Ecological-Environment Materials of Jiangsu Province, Yancheng Institute of Technology, Yancheng, 224051, PR China.

c. Theoretical Physics Department, National Research Centre, El-Buhouth Str., 12622, Dokki, Giza, Egypt.

d. Mechanical Design and Materials Department, Faculty of Energy Engineering, Aswan University, P.O. Box 81521, Aswan, Egypt

### Figure Captions

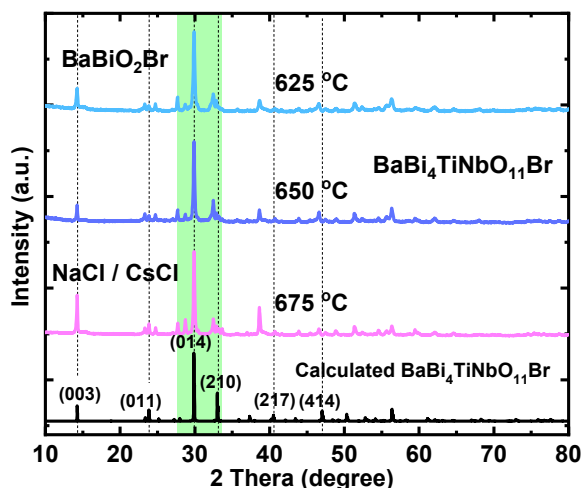

**Figure S1.** XRD patterns of BaBi<sub>4</sub>TiNbO<sub>11</sub>Br sample calcined from MSS at the temperature range of 625 - 675 °C for 12 h

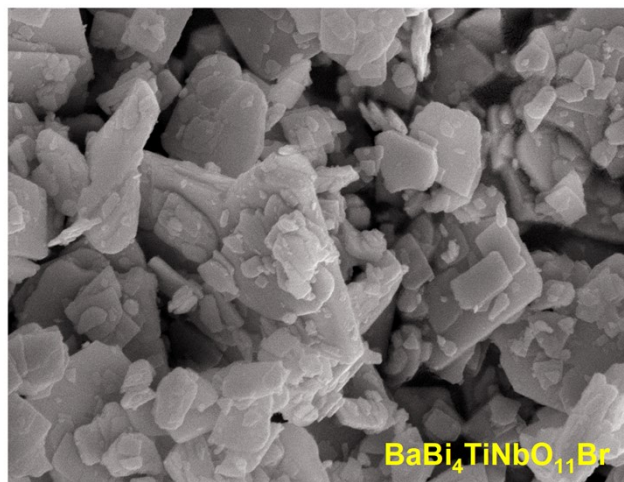

**Figure S2.** SEM image of  $\text{BaBi}_4\text{TiNbO}_{11}\text{Br}$  at the calcination temperature of  $650\text{ }^\circ\text{C}$ .

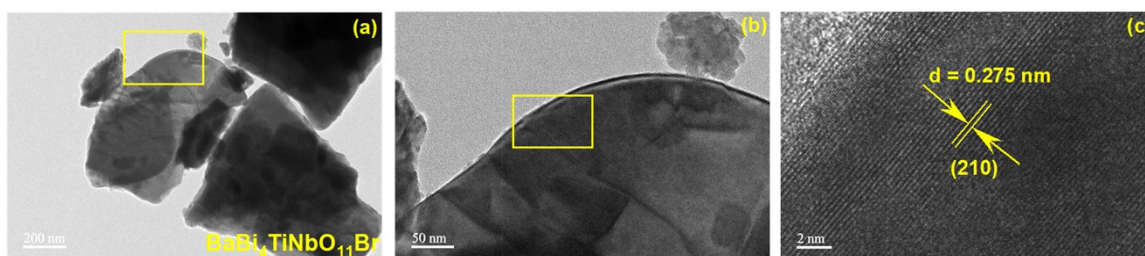

**Figure S3.** (a) TEM and (b, c) HRTEM images of  $\text{BaBi}_4\text{TiNbO}_{11}\text{Br}$ . in (c).

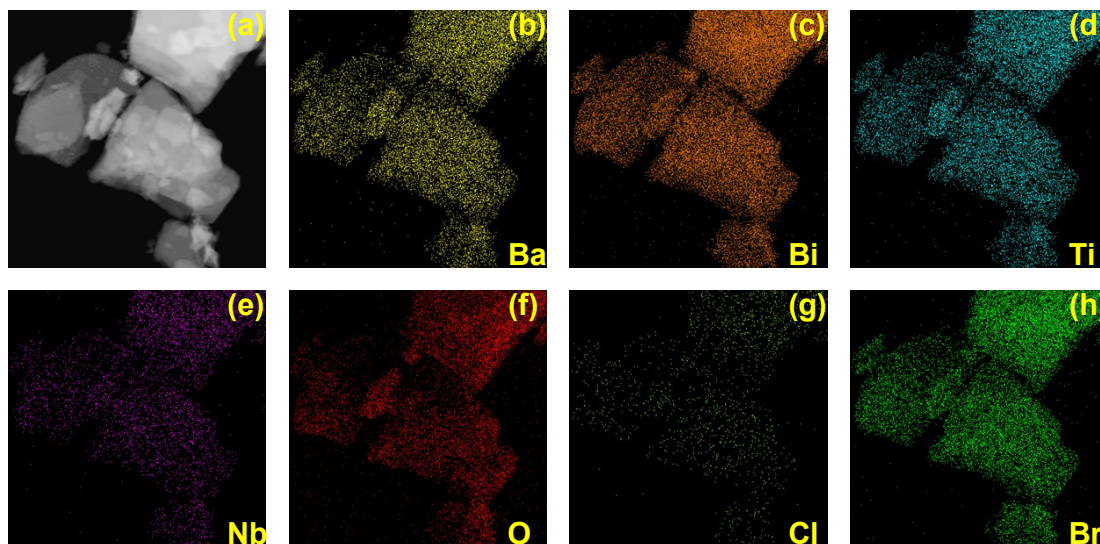

**Figure S4.** (a) TEM images of  $\text{BaBi}_4\text{TiNbO}_{11}\text{Br}$ . The corresponding TEM-EDS elemental mappings of (b) Ba, (c) Bi, (d) Ti, (e) Nb, (f) O, (g) Br, and (h) Cl.

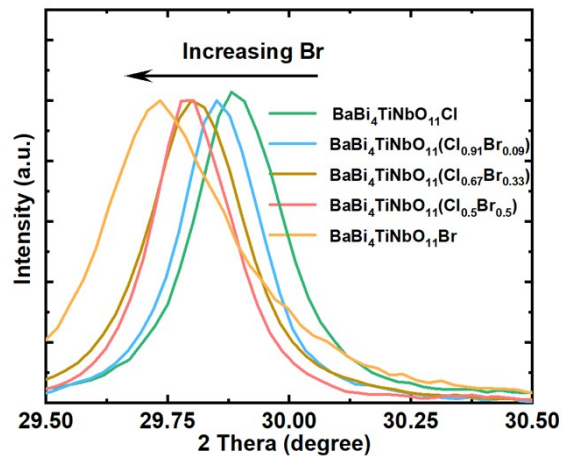

Figure S5. XRD patterns of  $\text{BaBi}_4\text{TiNbO}_{11}(\text{Cl}_{1-x}\text{Br}_x)$  with different Br content.

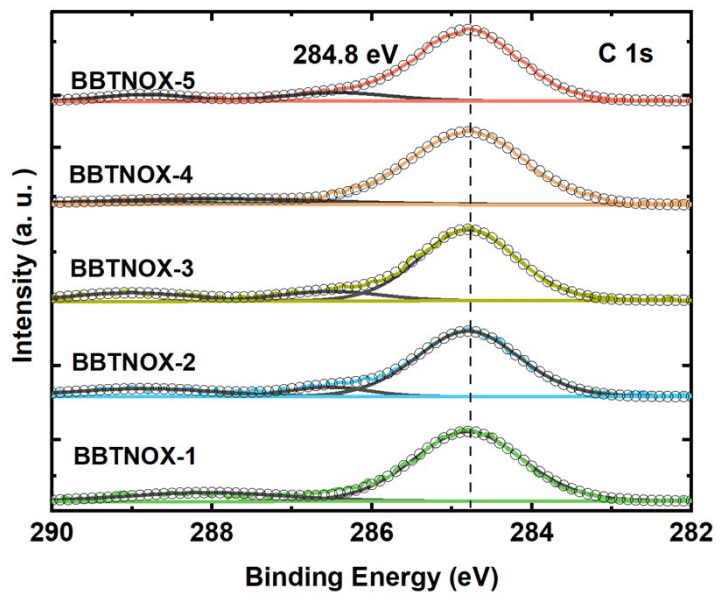

Figure S6. XPS peaks of the C-1s core levels.

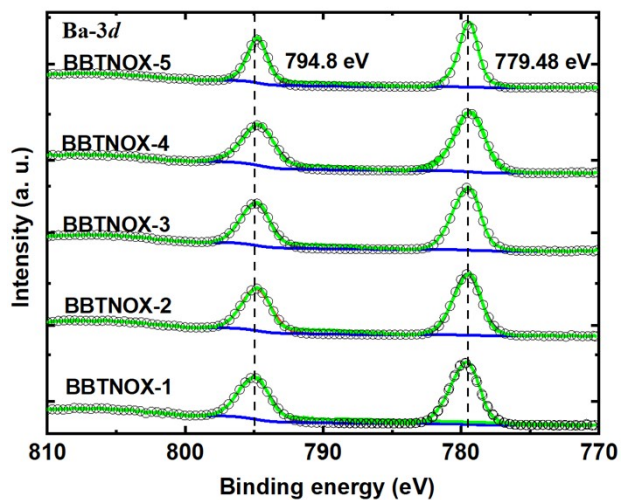

Figure S7. XPS peaks of the Ba-3d core levels.

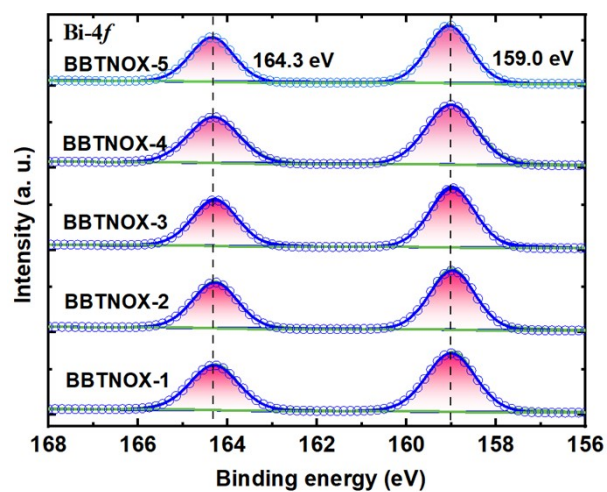

Figure S8. XPS peaks of the Bi-4f core levels.

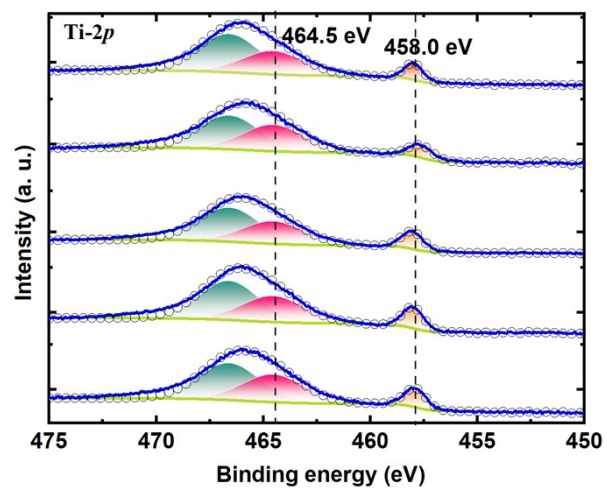

Figure S9. XPS peaks of the Ti-2p core levels.

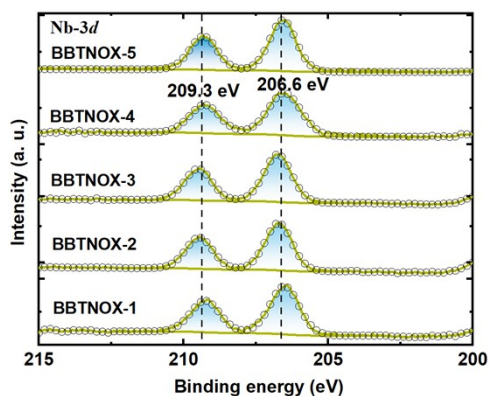

Figure S10. XPS peaks of the Nb-3d core levels.

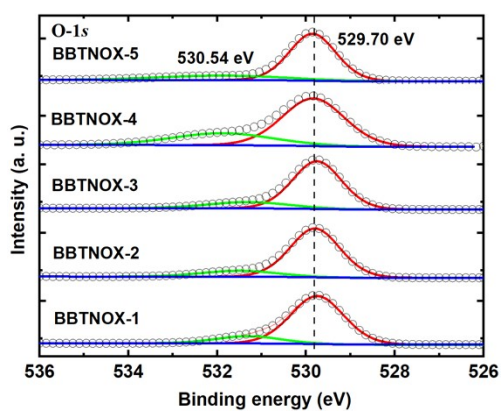

Figure S11. XPS peaks of the O-1s core levels.

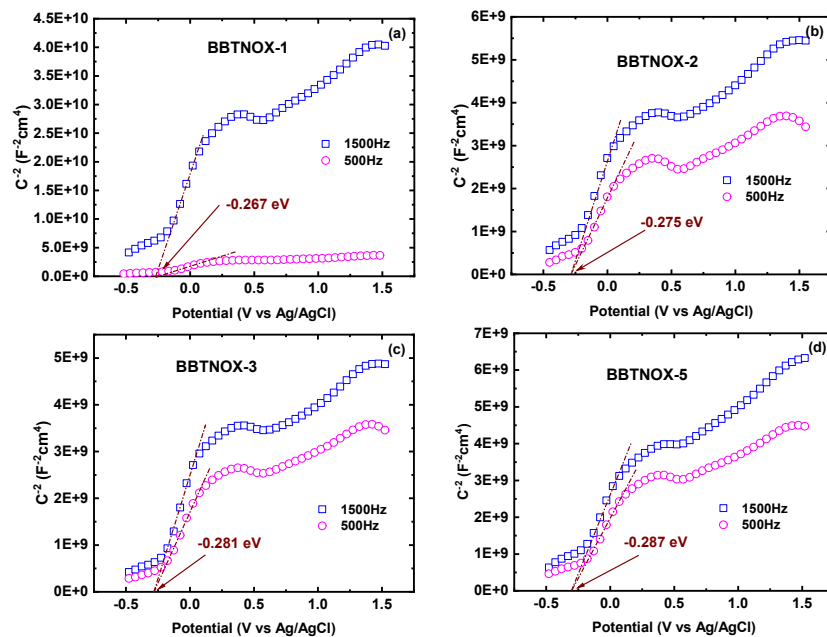

Figure S12. Mott-Schottky curves of (a)  $\text{BaBi}_4\text{TiNbO}_{11}\text{Cl}$ , (b)  $\text{BaBi}_4\text{TiNbO}_{11}(\text{Cl}_{0.91}\text{Br}_{0.09})$ , (c)  $\text{BaBi}_4\text{TiNbO}_{11}(\text{Cl}_{0.67}\text{Br}_{0.33})$ , and (d)  $\text{BaBi}_4\text{TiNbO}_{11}\text{Br}$ .



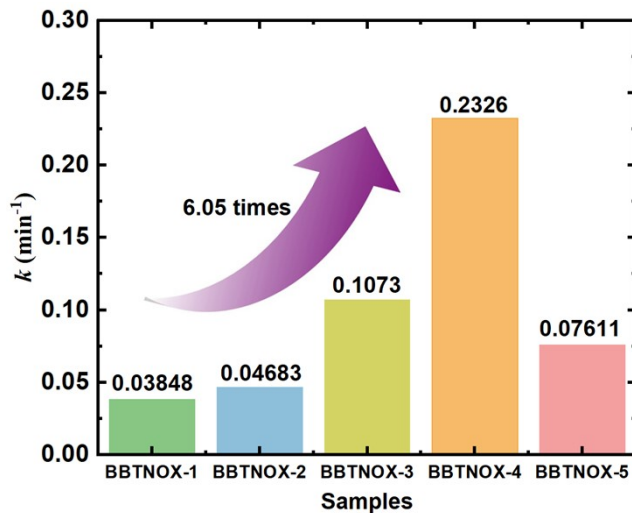

**Figure S13.** The corresponding  $k$  values of samples.

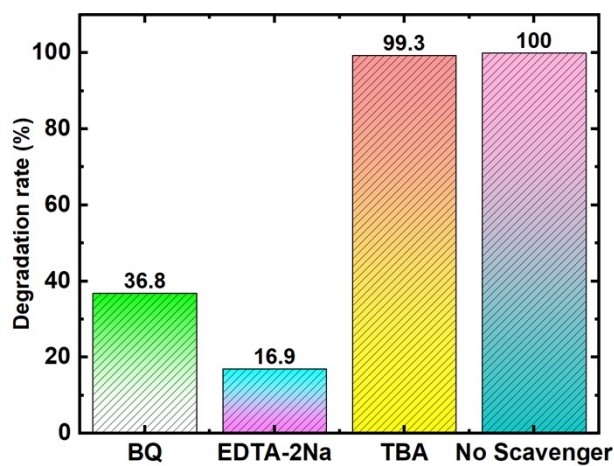

**Figure S14.** The degradation rate of RhB over  $\text{BaBi}_4\text{TiNbO}_{11}(\text{Cl}_{0.5}\text{Br}_{0.5})$  with the addition of BQ, EDTA-2Na, and TBA.

## Table Captions

**Table S1.** Components of halogen oxide materials from TEM-EDS in Figure S4.

| Element | Line Type | k Factor | k Factor type | Absorption Correction | Wt%  | Wt% Sigma | Atomic % |
|---------|-----------|----------|---------------|-----------------------|------|-----------|----------|
| O       | K series  | 2.020    |               | 1.00                  | 8.04 | 0.18      | 44.07    |
| Cl      | K series  | 1.026    |               | 1.00                  | 2.78 | 0.13      | 6.87     |
| Ti      | K series  | 1.090    |               | 1.00                  | 3.53 | 0.11      | 6.46     |
| Br      | K series  | 1.801    |               | 1.00                  | 0.41 | 0.07      | 0.45     |

|        |          |       |  |      |        |      |        |
|--------|----------|-------|--|------|--------|------|--------|
| Nb     | K series | 3.857 |  | 1.00 | 6.85   | 0.21 | 6.47   |
| Ba     | L series | 2.056 |  | 1.00 | 12.67  | 0.27 | 8.09   |
| Bi     | L series | 2.469 |  | 1.00 | 65.73  | 0.34 | 27.59  |
| Total: |          |       |  |      | 100.00 |      | 100.00 |
